# Supplementary material for: Nickel Removal from Aqueous Solution Using Chemically Treated Mahogany Sawdust as Biosorbent
Source: Hindawi journal article supplement (doi:10.1155/2021/4558271), 2021-09-20
Supplement: f1 [file 4558271.f1.zip]

Archive with 2 entries (2 files):
- 4558271.f1/Supplemental file (Fig. S1) 07 Sept 2021.docx
- 4558271.f1/Supplemental file (Fig. S2) 07 Sept 2021.docx
