# Supplementary material for: Nickel Removal from Aqueous Solution Using Chemically Treated Mahogany Sawdust as Biosorbent
Source: Hindawi journal article supplement (doi:10.1155/2021/4558271), 2021-09-20
Supplement: f1 [file 4558271.f1.zip › 4558271.f1/Supplemental file (Fig. S1) 07 Sept 2021.docx]

**Supplemental Figure S1:**

FIGURE S1: FTIR spectra of (i) Raw sawdust, (ii) Treated sawdust, and (iii) Spent sawdust.


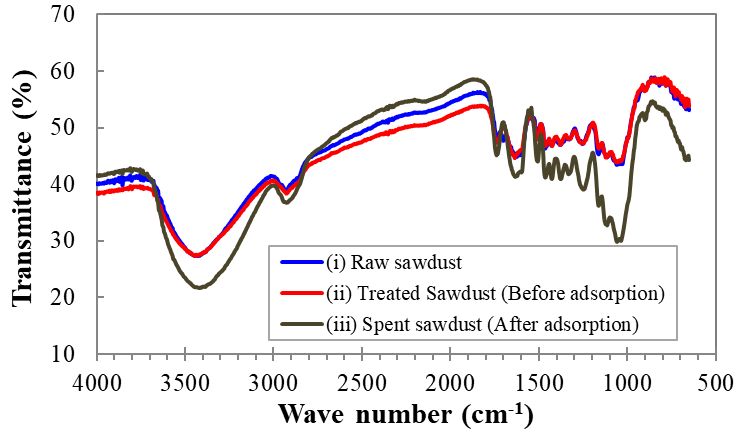


Nickel removal from aqueous solution by chemically treated mahogany sawdust adsorbent is linked with functional groups present in the adsorbent. The FIGURE S1 describes the absorbance spectra of raw sawdust, treated sawdust and spent sawdust within the wavenumber ranging from 4000 – 400 cm-1. The spectra were used to evaluate the rearrangement of chemical bonds as well as change in structures of sawdust. It is observed from this figure that some wavenumbers are slightly deviated after the adsorption process. This is the indication of nickel adsorption by the adsorbent through a metal-binding process.
