# Supplementary material for: Nickel Removal from Aqueous Solution Using Chemically Treated Mahogany Sawdust as Biosorbent
Source: Hindawi journal article supplement (doi:10.1155/2021/4558271), 2021-09-20
Supplement: f1 [file 4558271.f1.zip › 4558271.f1/Supplemental file (Fig. S2) 07 Sept 2021.docx]

**Supplemental Figure S2:**

FIGURE S2: Point of zero charge of chemically treated mahogany sawdust.


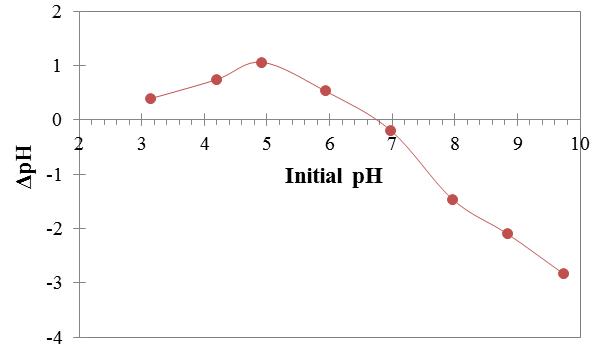


The point of zero charge (pHpzc) provides important information about the adsorbent surface charge, which might be helpful for understanding the adsorption mechanism. The pHpzc can be defined as the pH at which the net charge of an adsorbent surface is zero. FIGURE S2 demonstrates the point of zero charge of the adsorbent (chemically treated mahogany sawdust). The pHpzc was determined to be 6.8. It signifies that the adsorbent surface has positive charge at a solution pH less than pHpzc and the surface is supposed to adsorb negatively charged anions. On contrary, the adsorbent surface has negative charge at a solution pH higher than pHpzc and the adsorbent adsorbs positively charged cations. It is evident from experiments that nickel removal significantly increases at pH higher than the pHpzc.
